# Supplementary material
Source: Research Square preprint supplement (doi:10.21203/rs.3.rs-9351577/v1)
Supplement: Supplementary file 1 [file f601364b30d93e1f606e77a6.docx]

| **Supplementary Table 1**. Summary of published studies regarding decellularisation of the skeletal muscle | | | | | | |
| --- | --- | --- | --- | --- | --- | --- |
| Author, Year | Species | Decellularization method | Defect of muscle area | Confirmation of histological regeneration | Confirmation of functional recovery | Refs |
| Merritt et al, 2010 | Rat | 2.0% SDS | 10×10mm of lateral gastrocnemius | Growth of blood vessels and myofiber after 42 days of implantation | Does not occur after 42 days of implantation | 1 |
| Gillies et al, 2011 | Mouse | Latrunculin B + High ionic strength salt solutuions + DNAse | − | − | − | 2 |
| Fishman et al, 2013 | Rat | Latrunculin B + KCL + KI + DNase | 4mm of tibialis anterior | Partial regeneration | − | 3 |
| Corona et al, 2013 | Rat | Enzymatic/detergent + 0.15% trypsin + 3.0% triton X-100 | 10×7×3mm of tibialis anterior | Partial regeneration after 6 months of implantation | Partial recovery after 6 months of implantation | 4 |
| Kaskonis et al, 2016 | Rat | 1.0% SDS + DNAse | 8×3mm of tibialis anterior | Regeneration after 12 weeks of implantation | Partial recovery after 12 weeks of implantation | 5 |
| Quarta et al, 2017 | Mouse | 1.0% SDS | 2×7×2mm of tibialis anterior | myofibre formation, neovascularisation | Not restored after 2 months of implantation | 6 |
| Urciuolo et al, 2018 | Rat | Latrunculin B + Enzymatic detergent + 0.25% SDS | Extensor digitorum longus | Regeneration after 2 months of implantation | Partial recover | 7 |
| Lee et al, 2020 | Rat | 2.0% triton X-100 + 0.2% ammonium hydroxide + 0.1% EDTA + SDS (0.2% or 1.0%) | − | − | − | 8 |
| Current study | Rat | 0.1% SDS for 1 week | 10×7×2mm of tibialis anterior | Regeneration after 12 weeks of implantation | Complete recovery after 12 weeks of implantation | − |

**References in Supplementary Data**

1. Merritt EK, Hammers DW, Tierney M, Suggs LJ, Walters TJ, Farrar RP. Functional assessment of skeletal muscle regeneration utilizing homologous extracellular matrix as scaffolding. Tissue Engineering Part A. 2010;16(4):1395-405.

2. Gillies AR, Smith LR, Lieber RL, Varghese S. Method for decellularizing skeletal muscle without detergents or proteolytic enzymes. Tissue engineering part C: Methods. 2011;17(4):383-9.

3. Fishman JM, Lowdell MW, Urbani L, Ansari T, Burns AJ, Turmaine M, et al. Immunomodulatory effect of a decellularized skeletal muscle scaffold in a discordant xenotransplantation model. Proceedings of the National Academy of Sciences. 2013;110(35):14360-5.

4. Corona BT, Wu X, Ward CL, McDaniel JS, Rathbone CR, Walters TJ. The promotion of a functional fibrosis in skeletal muscle with volumetric muscle loss injury following the transplantation of muscle-ECM. Biomaterials. 2013;34(13):3324-35.

5. Kasukonis B, Kim J, Brown L, Jones J, Ahmadi S, Washington T, et al. Codelivery of infusion decellularized skeletal muscle with minced muscle autografts improved recovery from volumetric muscle loss injury in a rat model. Tissue Engineering Part A. 2016;22(19-20):1151-63.

6. Quarta M, Cromie M, Chacon R, Blonigan J, Garcia V, Akimenko I, et al. Bioengineered constructs combined with exercise enhance stem cell-mediated treatment of volumetric muscle loss. Nature communications. 2017 Jun 20;8:15613. Epub 20170620.

7. Urciuolo A, Urbani L, Perin S, Maghsoudlou P, Scottoni F, Gjinovci A, et al. Decellularised skeletal muscles allow functional muscle regeneration by promoting host cell migration. Scientific reports. 2018;8(1):1-20.

8. Lee H, Ju YM, Kim I, Elsangeedy E, Lee JH, Yoo JJ, et al. A novel decellularized skeletal muscle-derived ECM scaffolding system for in situ muscle regeneration. Methods. 2020;171:77-85.
